# Supplementary material for: Definition of a Dietary Pattern Expressing the Intake of Vegetables and Fruits and Its Association with Intestinal Microbiota
Source: MDPI journal article supplement (doi:10.3390/nu15092104), 2023-04-27
Supplement: s1 [file s1]

Supplemental Table S1. Bacterial genera that showed correlations with the intake of the Vege Pattern, GrYwVege, Citrus, and PerStr.

| Vege Pattern                | <i>P</i> for trend | beta      | Share Rating<br>(%) | Median relative<br>abundance (%) |
|-----------------------------|--------------------|-----------|---------------------|----------------------------------|
| <i>Mitsuokella</i>          | 0.0006             | 0.000913  | 10.6                | 0.40                             |
| <i>Barnesiella</i>          | 0.0071             | 0.000277  | 40.1                | 0.15                             |
| <i>Actinomyces</i>          | 0.0137             | -0.000094 | 97.0                | 0.052                            |
| <i>Calditerricola</i>       | 0.0188             | 0.000003  | 2.1                 | 0.0052                           |
| <i>Faecalibacterium</i>     | 0.0206             | 0.004927  | 97.4                | 7.3                              |
| <i>Atopobium</i>            | 0.0248             | -0.000046 | 40.1                | 0.022                            |
| <i>Neisseria</i>            | 0.0263             | 0.000001  | 3.2                 | 0.0046                           |
| <i>Escherichia.Shigella</i> | 0.0296             | -0.001369 | 77.9                | 0.037                            |
| <i>Lactonifactor</i>        | 0.0317             | -0.000010 | 31.6                | 0.010                            |
| <i>Varibaculum</i>          | 0.0386             | -0.000018 | 3.4                 | 0.0083                           |
| <i>Solobacterium</i>        | 0.0388             | -0.000007 | 33.8                | 0.0071                           |
| <i>Rothia</i>               | 0.0485             | -0.000026 | 59.5                | 0.014                            |

  

| GrYw Vege              | <i>P</i> for trend | beta       | Share<br>Rating<br>(%) | Median relative<br>abundance (%) |
|------------------------|--------------------|------------|------------------------|----------------------------------|
| <i>Alloprevotella</i>  | 0.0054             | -0.0011301 | 14.2                   | 0.97                             |
| <i>Scardovia</i>       | 0.0081             | -0.0000022 | 5.9                    | 0.0074                           |
| <i>Acinetobacter</i>   | 0.0145             | -0.0000005 | 1.7                    | 0.0030                           |
| <i>Coprococcus</i>     | 0.0191             | 0.0005298  | 74.6                   | 0.56                             |
| <i>Bacillus</i>        | 0.0272             | 0.0001075  | 55.2                   | 0.043                            |
| <i>Barnesiella</i>     | 0.0283             | 0.0001663  | 40.1                   | 0.15                             |
| <i>Asaccharobacter</i> | 0.0331             | 0.0000227  | 7.2                    | 0.012                            |
| <i>Proteus</i>         | 0.0415             | -0.0000040 | 4.1                    | 0.0032                           |
| <i>Kocuria</i>         | 0.0440             | -0.0000008 | 4.1                    | 0.0061                           |
| <i>Lactococcus</i>     | 0.0456             | 0.0000583  | 40.9                   | 0.0077                           |
| <i>Neisseria</i>       | 0.0467             | 0.0000009  | 3.2                    | 0.0046                           |

  

| Citrus             | <i>P</i> for trend | beta      | Share<br>Rating<br>(%) | Median relative<br>abundance (%) |
|--------------------|--------------------|-----------|------------------------|----------------------------------|
| <i>Actinomyces</i> | 0.0080             | -0.000076 | 97.0                   | 0.052                            |

|                                      |        |           |       |        |
|--------------------------------------|--------|-----------|-------|--------|
| <i>Abiotrophia</i>                   | 0.0081 | -0.000003 | 11.4  | 0.0054 |
| <i>Lachnospiracea_incertae_sedis</i> | 0.0097 | 0.000940  | 99.9  | 1.6    |
| <i>Allisonella</i>                   | 0.0118 | -0.000032 | 41.0  | 0.031  |
| <i>Succinivibrio</i>                 | 0.0141 | -0.000166 | 2.5   | 0.12   |
| <i>Neisseria</i>                     | 0.0199 | 0.000001  | 3.2   | 0.0046 |
| <i>Gardnerella</i>                   | 0.0214 | -0.000002 | 1.4   | 0.011  |
| <i>Faecalibacterium</i>              | 0.0221 | 0.003666  | 97.4  | 7.3    |
| <i>Tumebacillus</i>                  | 0.0229 | 0.000000  | 1.3   | 0.0030 |
| <i>Escherichia.Shigella</i>          | 0.0279 | -0.001039 | 77.9  | 0.037  |
| <i>Streptococcus</i>                 | 0.0310 | -0.002261 | 100.0 | 0.80   |
| <i>Stomatobaculum</i>                | 0.0339 | -0.000002 | 5.5   | 0.0057 |
| <i>Saccharofermentans</i>            | 0.0388 | 0.000001  | 1.2   | 0.0075 |
| <i>Veillonella</i>                   | 0.0397 | -0.000831 | 86.3  | 0.077  |
| <i>Raoultella</i>                    | 0.0471 | -0.000069 | 25.4  | 0.0094 |

| PerStr                     | P for trend | beta      | Share<br>Rating<br>(%) | Median relative<br>abundance (%) |
|----------------------------|-------------|-----------|------------------------|----------------------------------|
| <i>Gardnerella</i>         | 0.0296      | -0.000002 | 1.4                    | 0.011                            |
| <i>Acinetobacter</i>       | 0.0012      | -0.000001 | 1.7                    | 0.0030                           |
| <i>Succinivibrio</i>       | 0.0098      | -0.000174 | 2.5                    | 0.12                             |
| <i>Lachnoanaerobaculum</i> | 0.0158      | -0.000001 | 5.7                    | 0.0055                           |
| <i>Pyramidobacter</i>      | 0.0342      | -0.000060 | 6.8                    | 0.014                            |
| <i>Methanobrevibacter</i>  | 0.0208      | -0.000312 | 14.7                   | 0.11                             |
| <i>Parvimonas</i>          | 0.0411      | -0.000015 | 21.9                   | 0.0045                           |
| <i>Solobacterium</i>       | 0.0074      | -0.000007 | 33.8                   | 0.0071                           |
| <i>Eubacterium</i>         | 0.0038      | 0.000016  | 34.9                   | 0.0052                           |
| <i>Holdemanella</i>        | 0.0278      | 0.001125  | 38.1                   | 1.73                             |
| <i>Barnesiella</i>         | 0.0126      | 0.000191  | 40.1                   | 0.15                             |
| <i>Bilophila</i>           | 0.0300      | 0.000126  | 64.0                   | 0.20                             |
| <i>Turicibacter</i>        | 0.0252      | -0.000705 | 65.7                   | 0.070                            |
| <i>Actinomyces</i>         | 0.0358      | -0.000060 | 97.0                   | 0.052                            |

• *P for trend* was calculated by multiple regression analysis.

• Covariates: Age + Gender + Smoking + Drinking + BMI

Share Rating indicates the proportion of subjects with a read count of one or greater.

(GrYwVege: Green & Yellow Vegetables, PerStr: Persimmon & Strawberry)
